# Supplementary material for: HCK can serve as novel prognostic biomarker and therapeutic target for Breast Cancer patients
Source: PubMed Central journal article supplement (PMC7645343; doi:10.7150/ijms.43161), 2020-09-30
Supplement: ijmsv17p2773s1.pdf [file ijmsv17p2773s1.pdf]

**Supplementary Figure 1 Coexpedia analysis of network comprising *HCK* and neighboring genes.**

# Supplementary figure 1

A

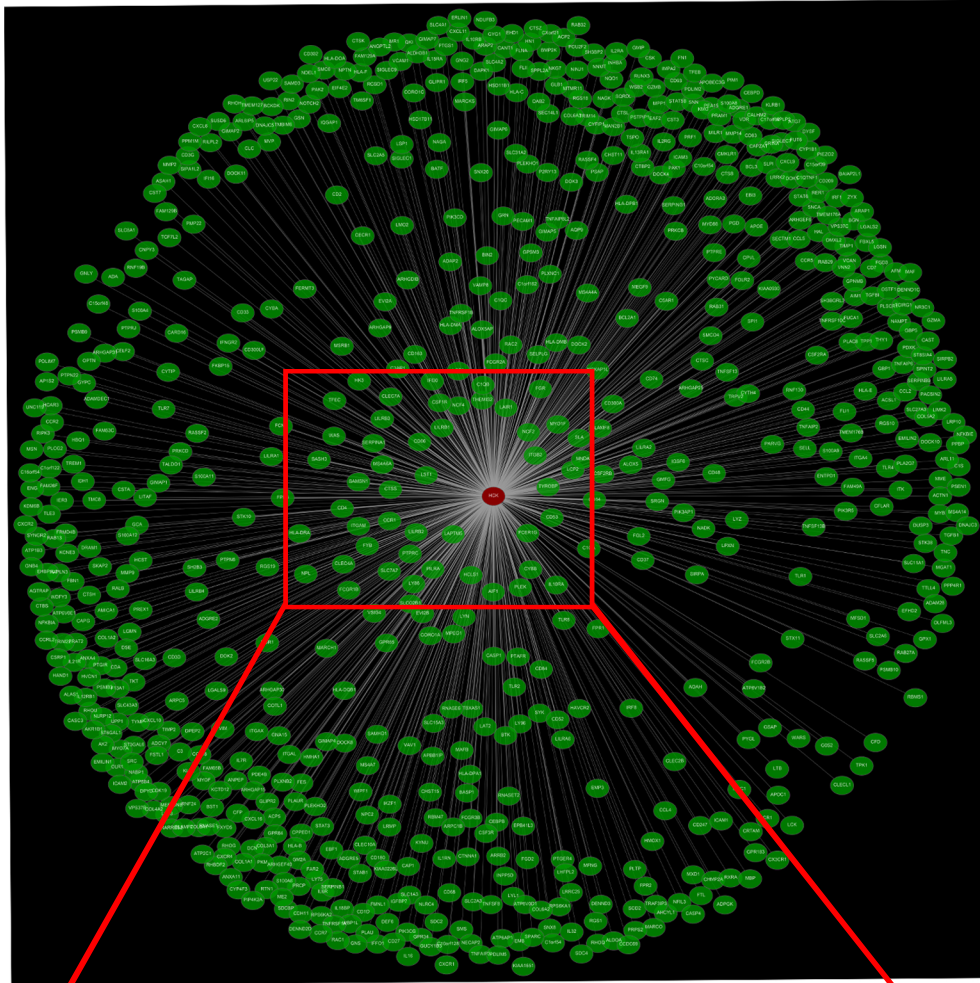

B

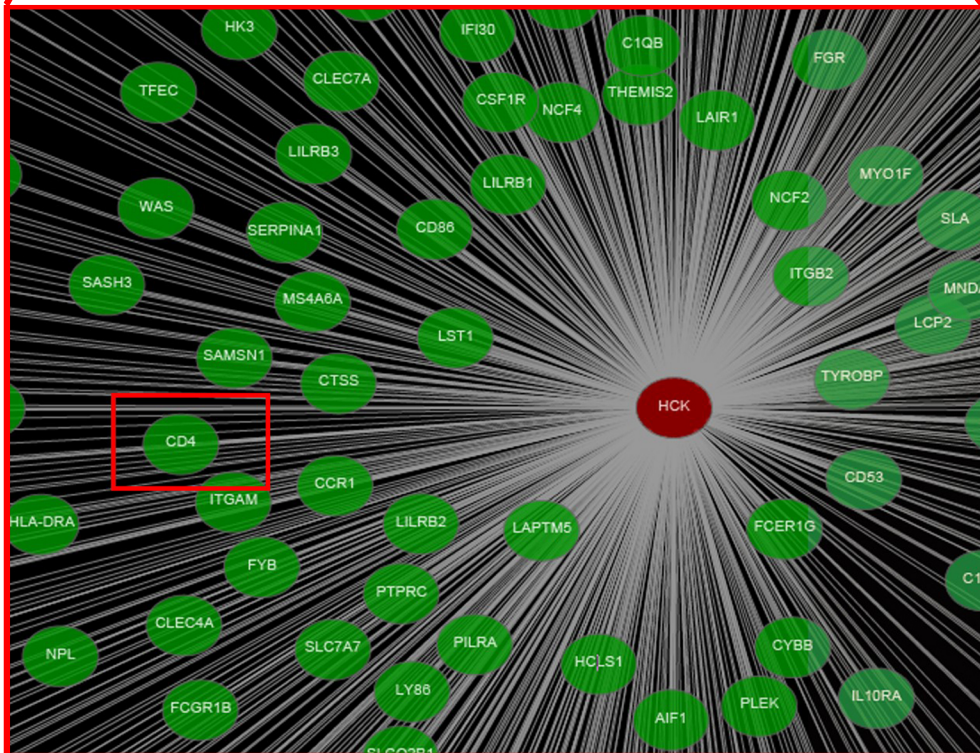

Supplementary table 1. The correlation analysis of HCK expression and pHCK expression in breast cancer patients

| HCK expression | pHCK expression |          |        | R value | <i>P</i> -value |
|----------------|-----------------|----------|--------|---------|-----------------|
|                | Negative        | Positive | Number |         |                 |
| Negative       | 30              | 10       | 40     | 0.327   | 0.002           |
| Positive       | 20              | 27       | 47     |         |                 |
| Number         | 50              | 37       | 87     |         |                 |
